# Supplementary material for: Associations of genetic proxies for non-steroidal anti-inflammatory drugs with increased kidney stone risk: a Mendelian randomization study
Source: Springer Nature journal article supplement (doi:10.1007/s10787-025-01866-z), 2025-07-29
Supplement: MOESM2 [file 10787_2025_1866_MOESM2_ESM.pdf]

Inflammopharmacology

# Associations of genetic proxies for nonsteroidal anti-inflammatory drugs with increased kidney stone risk: a Mendelian randomization study

Junfa Liu†, Kaiyi Dong†, Gang Qin, Chunyan Ye, Jinghan Wu, E Wang, Zhitao Dong\*

\*Zhitao Dong

Department of Urology, The Second Xiangya Hospital, Central South University, No. 139 Renmin Road, Changsha 410011, Hunan, China

zhitaodong@hotmail.com

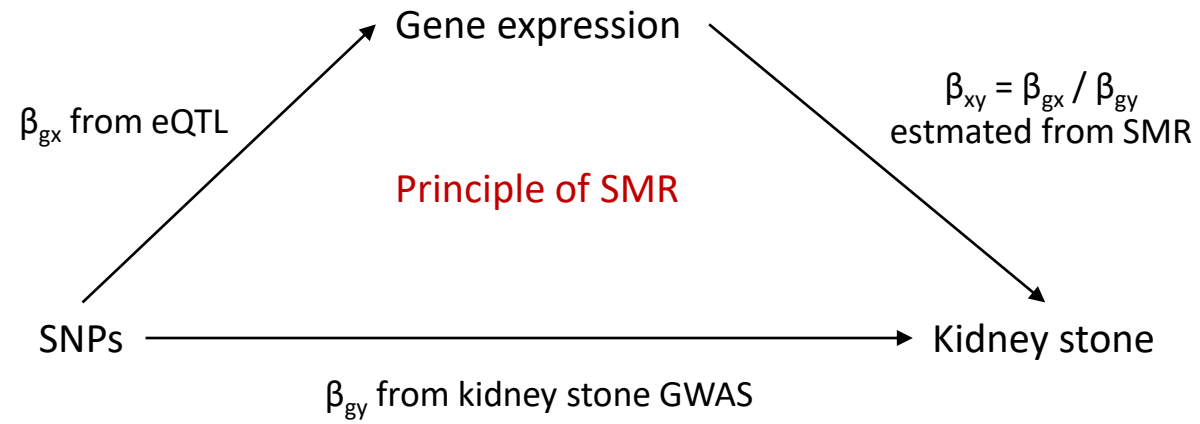

Fig. S1 Principle of SMR

The expression of NEU1 was significantly positively correlated with the level of aspirin metabolite Salicylic acid. Summary data-based Mendelian randomization analysis found a significant negative correlation between NEU1 expression and kidney stone risk, which is unlikely mediated by changes in the level of Salicylic acid.

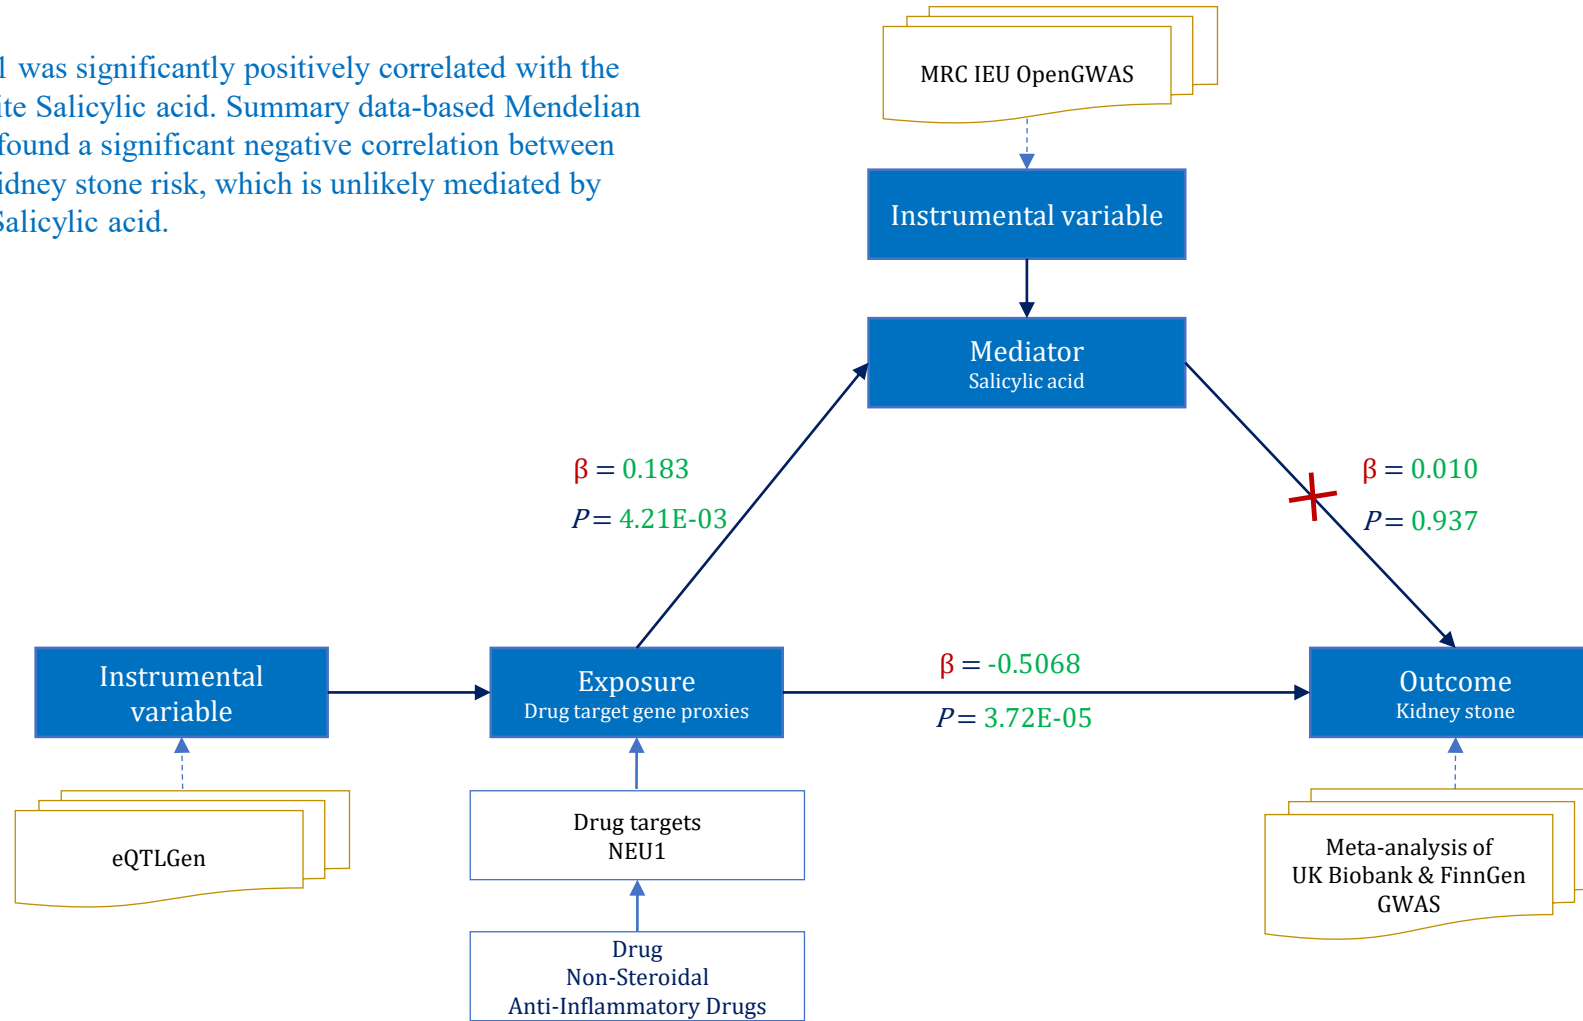

Fig. S2 Schematic diagram of research results (drug metabolites as mediator)
